# Supplementary material for: Current Approaches to the Use of Artificial Intelligence for Injury Risk Assessment and Performance Prediction in Team Sports: a Systematic Review
Source: Springer Nature journal article supplement (doi:10.1186/s40798-019-0202-3), 2019-07-03
Supplement: MOESM1 [file 24443224]

**Sports Medicine – Open. Current approaches to the use of artificial intelligence for injury risk assessment and performance prediction in team sports: a systematic review. João Gustavo Claudino, Daniel de Oliveira Capanema, Thiago Vieira de Souza, Julio Cerca Serrão, Adriano C. Machado Pereira, George P. Nassis. Corresponding author: João Gustavo Claudino; claudinojgo@usp.br. University of São Paulo, School of Physical Education and Sport - Laboratory of Biomechanics. Av. Prof. Mello de Moraes, 65 – Cidade Universitária. Postal Code: 05508-030, São Paulo, São Paulo, Brazil.**

|                        | A | B | C | D | E | $\Sigma$ |
|------------------------|---|---|---|---|---|----------|
| 2016 Abdullah [30]     | 1 | 1 | 2 | 2 | 1 | 7        |
| 2017 Adetiba [64]      | 1 | 1 | 2 | 2 | 1 | 7        |
| 2017 Bartlett [67]     | 1 | 1 | 2 | 2 | 1 | 7        |
| 2017 Bianchi [25]      | 1 | 1 | 1 | 2 | 1 | 6        |
| 2017 Bock [46]         | 1 | 1 | 1 | 2 | 1 | 6        |
| 2015 Bock [57]         | 1 | 1 | 1 | 2 | 1 | 6        |
| 2016 Carpita [45]      | 1 | 1 | 1 | 2 | 1 | 6        |
| 2018 Cene [43]         | 1 | 1 | 1 | 2 | 1 | 6        |
| 2015 Croft [34]        | 1 | 1 | 1 | 2 | 1 | 6        |
| 2015 Demers [59]       | 1 | 1 | 1 | 2 | 1 | 6        |
| 2018 Ertelt [65]       | 1 | 1 | 2 | 2 | 1 | 7        |
| 2016 Fuster-Parra [35] | 1 | 1 | 2 | 2 | 1 | 7        |
| 2017 Ge [66]           | 1 | 1 | 1 | 2 | 1 | 6        |
| 2016 Goswami [74]      | 1 | 1 | 2 | 2 | 1 | 7        |
| 2016 Gu [60]           | 1 | 1 | 1 | 2 | 1 | 6        |
| 2017 Haiyan [53]       | 1 | 1 | 1 | 2 | 1 | 6        |
| 2017 Hassan [27]       | 1 | 1 | 2 | 2 | 1 | 7        |
| 2017 Hassan [28]       | 1 | 1 | 1 | 2 | 1 | 6        |
| 2017 Healey [37]       | 1 | 1 | 1 | 2 | 1 | 6        |
| 2017 Hoch [48]         | 1 | 1 | 1 | 2 | 1 | 6        |
| 2017 Jaspers [73]      | 1 | 1 | 2 | 2 | 1 | 7        |
| 2014 Jelinek [38]      | 1 | 1 | 1 | 2 | 1 | 6        |
| 2017 Kautz [68]        | 1 | 1 | 1 | 2 | 1 | 6        |
| 2015 Kempe [24]        | 1 | 1 | 1 | 2 | 1 | 6        |
| 2017 Kolbush [54]      | 1 | 1 | 1 | 2 | 1 | 6        |
| 2017 Leicht [41]       | 1 | 1 | 1 | 2 | 1 | 6        |
| 2017 Leicht [42]       | 1 | 1 | 1 | 2 | 1 | 6        |

|                   |                                                                   |
|-------------------|-------------------------------------------------------------------|
|                   | A                                                                 |
| <b>Criteria</b>   | Peer reviewed                                                     |
| <b>Definition</b> | Study published in peer-reviewed journal                          |
| <b>Scoring</b>    | 0 1 2<br>No Yes -                                                 |
|                   | B                                                                 |
| <b>Criteria</b>   | Real-world approach                                               |
| <b>Definition</b> | The approach was performed with real results/data of the athletes |
| <b>Scoring</b>    | 0 1 2<br>No Yes -                                                 |
|                   | C                                                                 |
| <b>Criteria</b>   | Population defined                                                |
| <b>Definition</b> | Age, gender, sport, level were described                          |
| <b>Scoring</b>    | 0 1 2<br>No Partly Yes                                            |
|                   | D                                                                 |
| <b>Criteria</b>   | Experimental design                                               |
| <b>Definition</b> | Experimental design the study period was described and replicable |
| <b>Scoring</b>    | 0 1 2<br>No Partly Yes                                            |
|                   | E                                                                 |
| <b>Criteria</b>   | Artificial Intelligence                                           |

|                            |   |   |   |   |   |   |
|----------------------------|---|---|---|---|---|---|
|                            |   |   |   |   |   |   |
| 2013 Li [20]               | 1 | 1 | 1 | 2 | 1 | 6 |
| 2017 Link [36]             | 1 | 1 | 1 | 2 | 1 | 6 |
| 2017 Liu [a]               | 1 | 0 | 0 | 2 | 1 | 4 |
| 2018 López-Valenciano [15] | 1 | 1 | 1 | 2 | 1 | 6 |
| 2013 Lu [21]               | 1 | 1 | 1 | 2 | 1 | 6 |
| 2015 Montoliu [44]         | 1 | 1 | 1 | 2 | 1 | 6 |
| 2013 Morgan [45]           | 1 | 1 | 1 | 2 | 1 | 6 |
| 2017 Pai [62]              | 1 | 1 | 1 | 2 | 1 | 6 |
| 2017 Park [32]             | 1 | 1 | 1 | 2 | 1 | 6 |
| 2018 Pensgaard [69]        | 1 | 1 | 2 | 2 | 1 | 7 |
| 2016 Qilin [63]            | 1 | 1 | 1 | 2 | 1 | 6 |
| 2016 Robertson [39]        | 1 | 1 | 1 | 2 | 1 | 6 |
| 2018 Ruddy [70]            | 1 | 1 | 2 | 2 | 1 | 7 |
| 2014 Sankaran [49]         | 1 | 1 | 1 | 2 | 1 | 6 |
| 2017 Schrapf [29]          | 1 | 1 | 1 | 2 | 1 | 6 |
| 2017 Schulte [56]          | 1 | 1 | 1 | 2 | 1 | 6 |
| 2013 Sheng [52]            | 1 | 1 | 1 | 2 | 1 | 6 |
| 2016 Soto Valero [58]      | 1 | 1 | 1 | 2 | 1 | 6 |
| 2017 Strnad [31]           | 1 | 1 | 1 | 2 | 1 | 6 |
| 2017 Sui [b]               | 1 | 0 | 0 | 2 | 1 | 4 |
| 2017 Thornton [72]         | 1 | 1 | 1 | 2 | 1 | 6 |
| 2015 Tilp [26]             | 1 | 1 | 1 | 2 | 1 | 6 |
| 2017 Tümer [33]            | 1 | 1 | 1 | 2 | 1 | 6 |
| 2015 Vales-Alonso [51]     | 1 | 1 | 1 | 2 | 1 | 6 |
| 2014 Wang [50]             | 1 | 1 | 1 | 2 | 1 | 6 |
| 2018 Wang [61]             | 1 | 1 | 2 | 2 | 1 | 7 |
| 2017 Wang [c]              | 1 | 0 | 0 | 2 | 1 | 4 |
| 2017 Wen [d]               | 1 | 0 | 0 | 2 | 1 | 4 |
| 2016 Whiteside [76]        | 1 | 1 | 2 | 2 | 1 | 7 |
| 2018 Woods [40]            | 1 | 1 | 2 | 2 | 1 | 7 |
| 2013 Wu [22]               | 1 | 1 | 1 | 2 | 1 | 6 |

**Definition**

The Artificial Intelligence approaches/techniques

were described

**Scoring**

0 1 2

No Yes -

|                 |   |   |   |   |   |   |
|-----------------|---|---|---|---|---|---|
| 2018 Wu [75]    | 1 | 1 | 1 | 2 | 1 | 6 |
| 2013 Xing [e]   | 1 | 0 | 0 | 2 | 1 | 4 |
| 2014 Zhang [23] | 1 | 1 | 1 | 2 | 1 | 6 |
| 2017 Zi [55]    | 1 | 1 | 1 | 2 | 1 | 6 |
| 2018 Rossi [71] | 1 | 1 | 2 | 2 | 1 | 7 |

**Additional file 1: Table S1.** Risk of bias score.

$\Sigma$  = sum

- a) Liu P, Wang Y. Research on College Basketball Tactics based on Data Mining Clustering Technology. Rev Facul Ing U.C.V., 32(12), 417-422, 2017.
- b) Sui G. Research on competition tactical analysis in basketball teaching based on data mining technology. Agro Food Industry Hi-Tech, 28(3), 2584–2587, 2017.
- c) Wang Z, Chen D. An optimized data mining algorithm application in volleyball match technique and competition tactics analysis. Tech Bul, 782–787, 2017.
- d) Wen B. Technical analysis of a basketball match based on data mining. Agro Food Industry Hi-Tech, 28(1), 1953–1957, 2017.
- e) Xing J, Zheng X, Zhang S, et al. Computer simulation evaluation model of basketball match based on fuzzy neural network. BioTechnology, 8(7), 910–915, 2013.
