# Supplementary material for: Current Approaches to the Use of Artificial Intelligence for Injury Risk Assessment and Performance Prediction in Team Sports: a Systematic Review
Source: Springer Nature journal article supplement (doi:10.1186/s40798-019-0202-3), 2019-07-03
Supplement: MOESM2 [file 24443224]

**Sports Medicine – Open. Current approaches to the use of artificial intelligence for injury risk assessment and performance prediction in team sports: a systematic review. João Gustavo Claudino, Daniel de Oliveira Capanema, Thiago Vieira de Souza, Julio Cerca Serrão, Adriano C. Machado Pereira, George P. Nassis. Corresponding author: João Gustavo Claudino; claudinojgo@usp.br. University of São Paulo, School of Physical Education and Sport - Laboratory of Biomechanics. Av. Prof. Mello de Moraes, 65 – Cidade Universitária. Postal Code: 05508-030, São Paulo, São Paulo, Brazil.**

| Article (1 <sup>st</sup> author) | Aspects (Type)                                          | Sample (Profile; n)                           | Main Method               | Complete Method                                                                                                                         | Model Evaluation Metrics                                         |
|----------------------------------|---------------------------------------------------------|-----------------------------------------------|---------------------------|-----------------------------------------------------------------------------------------------------------------------------------------|------------------------------------------------------------------|
| 2013 Li [20]                     | Performance (Technical and Tactical Analysis)           | Basketball (Professional, n = nr, males)      | Artificial Neural Network | Artificial Neural Network with Back Propagation                                                                                         | Percentage of relative error = 0.08%; Mean square error = 0.0001 |
| 2013 Lu [21]                     | Performance (Physical Technical and Technical Analysis) | Basketball (Youth Academy, n = nr, males)     | Artificial Neural Network | Fuzzy Clustering + Technique for Order of Preference by Similarity to Ideal Solution + Radial Basis Function Neural Network             | Model Error = 4.96062e-007 (very small)                          |
| 2013 Wu [22]                     | Performance (Technical and Tactical Analysis)           | Basketball (Professional, n = nr, females)    | Artificial Neural Network | Artificial Neural Network with Back Propagation + Fuzzy Comprehensive Evaluation                                                        | Not reported                                                     |
| 2014 Zhang [23]                  | Performance (Technical and Tactical Analysis)           | Basketball (Professional, n = nr, males)      | Artificial Neural Network | Radial Basis Function                                                                                                                   | Prediction = 85%                                                 |
| 2015 Kemp [24]                   | Performance (Technical and Tactical Analysis)           | Basketball (Semi-Professional, n = 10, males) | Artificial Neural Network | Self-Organizing Maps                                                                                                                    | Accuracy = 98%                                                   |
| 2017 Bianchi [25]                | Performance (Technical and Tactical Analysis)           | Basketball (Professional; n = 476, males)     | Artificial Neural Network | Fuzzy Clustering Algorithm + Polynomial Fuzzifier Function + Multidimensional Scaling + Self-Organizing Map (Artificial Neural Network) | Not reported                                                     |
| 2015 Tilp [26]                   | Performance (Technical and Tactical Analysis)           | Handball (National Team U18, n = nr, males)   | Artificial Neural Network | Artificial Neural Network                                                                                                               | Not reported                                                     |
| 2017 Hassan [27]                 | Performance (Technical and Tactical Analysis)           | Handball (Youth Academy U18; n = 14, males)   | Artificial Neural Network | Self Organizing Maps (Artificial Neural Network)                                                                                        | Mean distance = 0.49 ± 0.20 m (high similarity)                  |

|                        |                                                               |                                              |                           |                                                                                                                              |                                                                                                                            |
|------------------------|---------------------------------------------------------------|----------------------------------------------|---------------------------|------------------------------------------------------------------------------------------------------------------------------|----------------------------------------------------------------------------------------------------------------------------|
| 2017 Hassan [28]       | Performance (Technical and Tactical Analysis)                 | Handball (National Teams U18; n = nr, males) | Artificial Neural Network | Radial Basis Function + Gaussian Classifier + Gradient Descent Algorithm                                                     | Mean distance = $1.20 \pm 0.46$ m (high accuracy); RMSE = 0.52 m (x direction) and 0.32 m (y direction)                    |
| 2017 Schrapf [29]      | Performance (Technical and Tactical Analysis)                 | Handball (National Teams U18; n = nr, males) | Artificial Neural Network | Artificial Neural Network                                                                                                    | Not reported                                                                                                               |
| 2016 Abdullah [30]     | Performance (Technical and Tactical Analysis)                 | Soccer (Youth Academy U17; n = 184, males)   | Artificial Neural Network | Principal Component Analysis + Hierarchical Agglomerative Cluster Analysis + Artificial Neural Network with Back Propagation | $R^2 = 92\%$ ; RMSE = 0.190; MR = 0.065                                                                                    |
| 2017 Strnad [31]       | Performance (Match Attendance)                                | Soccer (Professional, n = nr, males)         | Artificial Neural Network | Logistic transfer function + Multi Layer Perceptron + Three-Layer Feedforward Neural Network + Epoch Wise Back Propagation   | MAPE = $3.68\% \pm 0.03\%$ ; MAE = $785 \pm 7$                                                                             |
| 2017 Park [32]         | Performance (Technical and Tactical Analysis)                 | Baseball (Professional, n = nr, males)       | Artificial Neural Network | Adam optimization technique + Deep Neural network                                                                            | GM = 79%; Sensitivity = 98%; Specificity = 63%                                                                             |
| 2017 Tümer [33]        | Performance (Technical and Tactical Analysis)                 | Volleyball (Professional, n = nr, males)     | Artificial Neural Network | Multi-Layer Perceptron with Levenberg – Marquardt Back Propagation + Logsig Function                                         | Accuracy = 98%; MSE = 0.005337                                                                                             |
| 2015 Croft [34]        | Performance (Technical and Tactical Analysis)                 | Rugby (Professional; n = nr, males)          | Artificial Neural Network | Self-Organizing Map                                                                                                          | Qualitative Analysis (highlight colors)                                                                                    |
| 2016 Fuster-Parra [35] | Performance (Psychological Dynamics of Cooperative Team Work) | Soccer (Semi-Professional; n = 403, males)   | Bayesian Network          | Global Markov property + Bayesian network                                                                                    | Accuracy = $90\% \pm 0.3\%$ ; Sensitivity = $92 \pm 0.2\%$ ; Specificity = $65\% \pm 0.4\%$ ; Precision = $98\% \pm 0.3\%$ |
| 2017 Link [36]         | Performance (Technical and Tactical Analysis)                 | Soccer (Professional, n = nr, males)         | Bayesian Network          | Rauch-Tung-Striebel + Bayesian Network                                                                                       | Recall = 84%; Precision = 92%; F-Score = 87%                                                                               |

|                     |                                               |                                                   |                          |                                                                                                               |                                                      |
|---------------------|-----------------------------------------------|---------------------------------------------------|--------------------------|---------------------------------------------------------------------------------------------------------------|------------------------------------------------------|
|                     | Tactical Analysis)                            | males)                                            |                          |                                                                                                               |                                                      |
| 2017 Healey [37]    | Performance (Technical and Tactical Analysis) | Baseball (Professional; n = nr, males)            | Bayesian Network         | Bayes theorem + Kernel Methods + Cross-Validation + Weighted on Base Average                                  | Not reported                                         |
| 2014 Jelinek [38]   | Performance (Prediction based on Heart Rate)  | Australian Football (Professional; n = 40, males) | Decision Tree Classifier | Random Forest + Meta Regressions                                                                              | $R^2 = 74\%$                                         |
| 2016 Robertson [39] | Performance (Technical and Tactical Analysis) | Australian Football (Professional, n = nr, males) | Decision Tree Classifier | One-way ANOVA + Logistic Regression + Classification Trees                                                    | Accuracy = 90%                                       |
| 2018 Woods [40]     | Performance (Technical and Tactical Analysis) | Australian Football (Academy U18, n = 244, males) | Decision Tree Classifier | PART decision list                                                                                            | Accuracy = 70%                                       |
| 2017 Leicht [41]    | Performance (Technical and Tactical Analysis) | Basketball (Professional, n = nr, males)          | Decision Tree Classifier | Spearman's Correlation Matrix + MANOVA + Cohen's d Statistic + Conditional Interference + Classification Tree | Accuracy = 81%                                       |
| 2017 Leicht [42]    | Performance (Technical and Tactical Analysis) | Basketball (Professional, n = nr, females)        | Decision Tree Classifier | MANOVA + Cohen's d Statistic + Conditional Interference + Classification Tree                                 | Accuracy = 86%                                       |
| 2018 Cene [43]      | Performance (Technical and Tactical Analysis) | Basketball (Professional; n = nr, males)          | Decision Tree Classifier | K-means Cluster Analysis + Bayesian Model Averaging + Classification Tree                                     | Accuracy = 80%                                       |
| 2015 Montoliu [44]  | Performance (Technical and Tactical Analysis) | Soccer (Professional, n = nr, males)              | Decision Tree Classifier | Bag-of-Words + Random Forest                                                                                  | Accuracy = 93% ± 0.2%                                |
| 2016 Carpita [45]   | Performance (Technical and Tactical Analysis) | Soccer (Professional, n = 746, males)             | Decision Tree Classifier | Random Forests + Principal Component Analysis + Multinomial Logistic Regression                               | Accuracy = 64%; Specificity = 69%; Sensitivity = 84% |
| 2017 Bock [46]      | Performance (Technical and Tactical Analysis) | American Football (Professional; n = nr, males)   | Decision Tree Classifier | Bernoulli Distribution Loss Function + Logistic Regression + Gradient                                         | False discovery rates = < 15%.                       |

|                        |                                                                  |                                                     |                             |                                                                                          |                                                                         |
|------------------------|------------------------------------------------------------------|-----------------------------------------------------|-----------------------------|------------------------------------------------------------------------------------------|-------------------------------------------------------------------------|
|                        | Tactical Analysis)                                               | males)                                              |                             | Boosting Machines                                                                        |                                                                         |
| 2013 Morgan [47]       | Performance<br>(Technical and<br>Tactical Analysis)              | Field Hockey<br>(Professional, n = 8,<br>females)   | Decision Tree<br>Classifier | Decision Tree Induction                                                                  | Accuracy = 64%; AUC = 71%                                               |
| 2017 Hoch [48]         | Performance<br>(Technical and<br>Tactical Analysis)              | Soccer<br>(Professional; n = 20,<br>males)          | Fuzzy Clustering            | Fuzzy Rule Bases + Laplacian Score +<br>Spectral Clustering Method + Fuzzy<br>Clustering | Not reported                                                            |
| 2014 Sankaran [49]     | Performance<br>(Technical and<br>Tactical Analysis)              | Cricket<br>(Professional, n = 104,<br>males)        | K-Means<br>Clustering       | K-Means Cluster Analysis                                                                 | Not Reported                                                            |
| 2014 Wang [50]         | Performance<br>(Technical and<br>Tactical Analysis)              | Soccer<br>(Professional, n = nr,<br>males)          | K-Means<br>Clustering       | Genetic Algorithm + Self Organizing<br>Map                                               | Possession percentage = 57%; Free kick 17%                              |
| 2015 Vales-Alonso [51] | Performance<br>(Physical, Technical<br>and Tactical<br>Analysis) | Volleyball<br>(Professional, n = nr,<br>females)    | K-Nearest<br>Neighbour      | Bellman's equation + Markov decision<br>process + k-NN Classifier                        | True positives = 93%; True negatives = 100%                             |
| 2013 Sheng [52]        | Performance<br>(Technical and<br>Tactical Analysis)              | Volleyball<br>(Professional, n = nr)                | Markov Process              | Fuzzy evaluation + Markov Process                                                        | Not reported                                                            |
| 2017 Haiyan [53]       | Performance<br>(Technical and<br>Tactical Analysis)              | Volleyball<br>(Professional; n = nr,<br>females)    | Markov Process              | Random Sampling Techniques +<br>Markov Process                                           | Not reported                                                            |
| 2017 Kolbush [54]      | Performance<br>(Technical and<br>Tactical Analysis)              | American Football<br>(Collegiate, n = nr,<br>males) | Markov Process              | Logistic Regression + Markov Chain<br>Model                                              | Accuracy = 61%                                                          |
| 2017 Zi [55]           | Performance<br>(Technical and<br>Tactical Analysis)              | Basketball<br>(Professional, n = nr,<br>males)      | Markov Process              | Apriori Algorithm + Markov Process                                                       | Not reported                                                            |
| 2017 Schulte [56]      | Performance<br>(Technical and                                    | Ice Hockey<br>(Professional, n =                    | Markov Process              | Affinity Propagation + Markov Game<br>Formalism + Dynamic Programming                    | Average Goal Ratio, $\rho = 0.7$ ;<br>Average Team Winning Chance = 82% |

|                       |                                                       |                                                                                |                                                            |                                                                                                                                                                                                                                                                               |                                                                           |
|-----------------------|-------------------------------------------------------|--------------------------------------------------------------------------------|------------------------------------------------------------|-------------------------------------------------------------------------------------------------------------------------------------------------------------------------------------------------------------------------------------------------------------------------------|---------------------------------------------------------------------------|
|                       | Tactical Analysis)                                    | 2233, males)                                                                   |                                                            |                                                                                                                                                                                                                                                                               |                                                                           |
| 2015 Bock [57]        | Performance<br>(Technical and<br>Tactical Analysis)   | Baseball<br>(Professional, n = 402,<br>males)                                  | Support Vector<br>Machine                                  | Cross-Validation + Support Vector<br>Machine + Radial Basis Function<br>Kernels                                                                                                                                                                                               | Accuracy = 70%; Predictability = 75%.                                     |
| 2016 Soto Valero [58] | Performance<br>(Technical and<br>Tactical Analysis)   | Baseball<br>(Professional, n = nr,<br>males)                                   | Support Vector<br>Machine                                  | Attribute ranking technique + Support<br>Vector Machine + Sequential Minimal<br>Optimization                                                                                                                                                                                  | Accuracy = 59%                                                            |
| 2015 Demers [59]      | Performance<br>(Technical and<br>Tactical Analysis)   | Ice Hockey<br>(Professional; n = nr,<br>males)                                 | Support Vector<br>Machine                                  | Sigmoid Function + Minimizing the<br>Negative Log-Likelihood Function +<br>Support Vector Machine                                                                                                                                                                             | Percentage Correctly Predicted = 70%                                      |
| 2016 Gu [60]          | Performance<br>(Technical and<br>Tactical Analysis)   | Ice Hockey<br>(Professional; n = nr,<br>males)                                 | Support Vector<br>Machine                                  | Wilcoxon Rank-Sum Test + Support<br>Vector Machine + Analytic Network<br>Process                                                                                                                                                                                              | Accuracy = 78%                                                            |
| 2018 Wang [61]        | Performance<br>(Technical and<br>Tactical Analysis)   | Volleyball<br>(Professional, n = 10,<br>males)                                 | Support Vector<br>Machine                                  | Principal Component Analysis +<br>Support Vector Machine                                                                                                                                                                                                                      | Accuracy = 94%; Recall = 93%; F1-score =<br>93%                           |
| 2017 Pai [62]         | Performance<br>(Technical and<br>Tactical Analysis)   | Basketball<br>(Professional, n = nr,<br>males)                                 | Support Vector<br>Machine +<br>Decision Tree<br>Classifier | Correlation-based Feature Selection +<br>Support Vector Machine + Decision<br>Tree Classifier                                                                                                                                                                                 | Accuracy = 85%                                                            |
| 2016 Qilin [63]       | Injury<br>(Training<br>Process/Knee Injury<br>Causes) | Soccer<br>(Collegiate, n = 60,<br>males)                                       | Artificial Neural<br>Network                               | Exploratory Factor Analysis + Factory<br>Analysis + Artificial Neural Network<br>with Back Propagation                                                                                                                                                                        | KMO = 87%                                                                 |
| 2017 Adetiba [64]     | Injury<br>(Heart Defect<br>Detection)                 | Soccer and Basketball<br>(Professional; n = 5,<br>males and n = 5,<br>females) | Artificial Neural<br>Network                               | Fast Fourier Transform + Inverse<br>Fourier Transform + Multi-Layer<br>Perceptron-Artificial Neural Network<br>based Back Propagation + Multi-Layer<br>Perceptron - Artificial Neural Network<br>based Levenberg-Marquardt + Tangent<br>Sigmoid Activation(hidden and output) | Accuracy = 98%; Sensitivity, =<br>98%; Specificity = 99%; MSE =<br>0.0093 |

|                            |                                               |                                                                                    |                              |                                                                                                  |                                                                                                             |
|----------------------------|-----------------------------------------------|------------------------------------------------------------------------------------|------------------------------|--------------------------------------------------------------------------------------------------|-------------------------------------------------------------------------------------------------------------|
| 2018 Ertelt [65]           | Injury (Ground Reaction Force Pattern)        | Soccer, Volleyball and Handball (Professional; n = ~9, males)                      | Artificial Neural Network    | Normalizations and Approximations + Bayesian Regularization Artificial Neural Network            | Accuracy = 94%; Predictability = 94%                                                                        |
| 2017 Ge [66]               | Injury (Training Process/Knee Injury Causes)  | Basketball (Collegiate; n = nr, males)                                             | Artificial Neural Network    | Exploratory Factor Analysis + Factory Analysis + Artificial Neural Network with Back Propagation | KMO = 87%                                                                                                   |
| 2017 Bartlett [67]         | Injury (Training load)                        | Australian Football (Professional; n = 41, males)                                  | Artificial Neural Network    | Generalised Estimating Equations + Artificial Neural Network (Individually)                      | RMSE = $1.24 \pm 0.41$                                                                                      |
| 2017 Kautz [68]            | Injury (Monitoring based on Wearable Sensors) | Beach Volleyball (Youth Academy - Professional; n = 11, females and n = 19, males) | Artificial Neural Network    | Decision Tree (C4.5) + Deep Convolutional Neural Network                                         | Accuracy = 83%                                                                                              |
| 2018 Pensgaard [69]        | Injury (Psychosocial Stress Factors)          | Soccer (Professional, n = 193, females)                                            | Bayesian Logistic Regression | Bayesian Correlation Analyses + Bayesian Logistic Regression + Markov Chain Monte Carlo          | Not Reported                                                                                                |
| 2018 Ruddy [70]            | Injury (Screening)                            | Australian Football (Professional, n = 362, males)                                 | Bayesian Network             | Synthetic Minority Oversampling Techniques + Naive Bayes                                         | AUC = 54%                                                                                                   |
| 2018 López-Valenciano [15] | Injury (Screening)                            | Soccer and Handball (Professional, n = 132, males)                                 | Decision Tree Classifier     | Synthetic Minority Oversampling Technique + Bagging-based Cost-Sensitive Classifier + Adtree     | AUC = 75%; True Positive Rate = 66%; True Negative Rate = 79%                                               |
| 2018 Rossi [71]            | Injury (Training Load)                        | Soccer (Professional, n = 26, males)                                               | Decision Tree Classifier     | Cross Validation + Adaptive Synthetic Sampling Approach + Decision Tree Classifier               | Recall = $80\% \pm 0.07$ ; Precision = $50\% \pm 0.11$ ; F1-score = $64\% \pm 0.10$ ; AUC = $76\% \pm 0.12$ |
| 2017 Thornton [72]         | Injury (Training Load)                        | Rugby (Professional, n = 25, males)                                                | Decision Tree Classifier     | Generalized Estimating Equations + Random Forest                                                 | ROC = $64\% \pm 0.04$                                                                                       |

|                     |                                                   |                                                         |                                                 |                                                                                                                            |                                                                       |
|---------------------|---------------------------------------------------|---------------------------------------------------------|-------------------------------------------------|----------------------------------------------------------------------------------------------------------------------------|-----------------------------------------------------------------------|
| 2018 Jaspers [73]   | Injury (Training Load)                            | Soccer (Professional; n = 38, males)                    | Least Absolute Shrinkage and Selection Operator | Naive Baseline Method + Least Absolute Shrinkage and Selection Operator (For Group)                                        | MAE = 0.80 (0.78 – 0.82)                                              |
| 2016 Goswami [74]   | Injury (Concussion)                               | American Football (Retired Professional; n = 19, males) | Support Vector Machine                          | Cross-validation (Leave-One-Out), Radial Basis Function + Logistic Regression Classifier (Elasticnet + Glnet + LRC + ADMM) | Accuracy = 83%; AUC = 81%                                             |
| 2018 Wu [75]        | Injury (Concussion)                               | American Football (Collegiate, n = 419, males)          | Support Vector Machine                          | Principal Component Analysis + Support Vector Machine                                                                      | Accuracy = 94%; Precision = 94%; Sensitivity = 94%; Specificity = 94% |
| 2016 Whiteside [76] | Injury (Ulnar Collateral Ligament Reconstruction) | Baseball (Professional, n = 208, males)                 | Support Vector Machine                          | Logistic Regression + Support Vector Machine                                                                               | Accuracy = 75%                                                        |

**Additional file 2: Table S2.** Summary of the AI studies.

n = sample size; nr = not reported; AUC = area under the curve;  $R^2$  = Correlation of Determination; RMSE = Root Mean Square Error; MR = Misclassification Rate; MSE = Mean Squared Error; MAE = Mean Absolute Error; GM = Geometric mean of sensitivity and specificity to consider the positive and negative classes equally; nr = not reported; KMO = Kaiser-Meyer-Olkin Test; ROC = Receiver Operating Characteristic curves, providing information regarding the sensitivity (true positive rate) by one minus specificity (false positive rate).
